# Supplementary material for: Relation between peripheral blood inflammatory indices and severity of central retinal artery occlusion
Source: PeerJ. 2024 Sep 30;12:e18129. doi: 10.7717/peerj.18129 (PMC11448653; doi:10.7717/peerj.18129)
Supplement: Supplemental Information 1 [file peerj-12-18129-s001.xlsx]

## Sheet: All data
Group (0-control,1-incomplete RAO, 2-subtotal RAO, 3-total RAO)	Is it RAO (0-no,1-yes)	Is it hypertensive (0-no,1-yes)	Is it smoking (0-no,1-yes)	Is it diabetes (0-no,1-yes)	BMI	gender (1-male,2-female)	age	white blood cell	neutrophil	lymphocyte	monocyte	platelet	mean platelet volume	platelet distribution width	creatinine	urea nitrogen	Total Cholesterol	Triglycerides	HDL	LDL	APOA/APOB	T-BIL	D-BIL	MHR	NLR	PLR	MLR	SII
0	0	0	0	0	28.01	1	85	4.98	2.87	1.52	0.34	182	10.2	10.4	93	7.51	5.06	1.19	1.56	3.58	1.03	12.9	3.4	0.217949	1.88816	119.737	0.223684	343.645
0	0	0	0	0	23.18	2	61	7.14	3.91	2.56	0.45	170	10.7	16.6	112	7.12	6.27	0.89	1.57	4.1		10.5	2.4	0.286624	1.52734	66.4062	0.175781	259.648
0	0	1	1	0	23.62	1	55	8.4	5.16	2.61	0.44	309	9.7	10.4	99.4	3.93	3.51	1.08	1.12	2.32	1.61	11.9	5.9	0.392857	1.97701	118.391	0.168582	610.897
0	0	0	0	0	29.06	1	54	6	3.75	1.71	0.42	231	10.9	12.8	103	3.43	3.39	0.71	1.8	2	1.67	10.3	3.3	0.233333	2.19298	135.088	0.245614	506.579
0	0	0	0	1	21.22	1	89	8.26	4.1	3.62	0.39	401	10.4	11	93.5	4.63	5.32	1.08	1.75	3.19	1.54	20.49	4.19	0.222857	1.1326	110.773	0.107735	454.171
0	0	0	0	0	20.86	2	46	5.51	2.7	2.34	0.3	260	10.1	11.5	75.9	3.72	4.62	0.83	1.89	2.19	1.88	14.3	4.8	0.15873	1.15385	111.111	0.128205	300
0	0	0	0	0	18	1	56	6.2	4.32	1.33	0.37	295	10	10.8	62.2	5.74	4.19	0.6	1.33	2.61	1.35	14.5	4.4	0.278195	3.24812	221.805	0.278195	958.195
0	0	0	0	1	18.75	2	55	7.58	4.76	2.42	0.28	351	9.2	9.2	73.6	3.71	3.77	1	1.26	2.21	1.69	8.7	2.9	0.222222	1.96694	145.041	0.115702	690.397
0	0	1	1	0	20.81	1	56	8.97	4.81	3.21	0.53	238	9.4	10.2	98.9	5.15	6.22	5.87	1.2	2.62	0.94	13.4	2.3	0.441667	1.49844	74.1433	0.165109	356.629
0	0	1	0	0	26	1	49	8.9	4.46	3.58	0.64	323	9.2	9.9	90.7	6.22	4.39	1.19	1.17	3.4	1.18	9	3.5	0.547009	1.24581	90.2235	0.178771	402.397
0	0	0	0	0	30.3	2	49	5.99	3.31	2.11	0.4	334	9.6	10.4	76.4	5.4	4.13	1.01	1.14	3.09	1.36	8.2	2.5	0.350877	1.56872	158.294	0.189573	523.953
0	0	0	0	1	26.67	1	53	5.44	2.96	1.93	0.25	207	10.6	12.9	67.7	3.63	4.34	2.21	1.19	3.04	1.6	12.6	4.3	0.210084	1.53368	107.254	0.129534	317.472
0	0	1	1	0	25.33	1	78	5.14	2.65	1.86	0.36	189	10.3	11.5	78.9	6.12	4.92	0.69	1.79	2.78	1.83	9.4	2.6	0.201117	1.42473	101.613	0.193548	269.274
0	0	0	0	0	23.24	2	62	8.08	4.32	3.11	0.39	340	10	10.8	84.5	4.3	3.77	0.88	1.59	2.06	1.89	7.8	2	0.245283	1.38907	109.325	0.125402	472.283
0	0	0	0	0	20.08	2	47	5.65	4.19	1.11	0.27	251	9.4	9.6	68.8	3.79	3.77	0.34	1.44	1.9	1.83	11.9	3.2	0.1875	3.77477	226.126	0.243243	947.468
0	0	0	0	0	26.34	1	65	5.45	3.04	1.84	0.37	210	10.3	11.6	97.7	5.82	4.78	2.02	1.77	3.7	1.16	11.7	2.6	0.20904	1.65217	114.13	0.201087	346.957
0	0	1	0	1	22.31	1	49	6.8	3.95	2.03	0.53	234	11	13.2	110.5	4.83	5.13	0.94	1.62	3.29	1.13	13.9	3.3	0.32716	1.94581	115.271	0.261084	455.32
0	0	0	0	0	27.34	2	62	8.01	5.03	1.7	0.42	244	10.6	11.8	84.1	4.53	3.52	1.95	1.67	2.48	0.97	14.6	2.9	0.251497	2.95882	143.529	0.247059	721.953
0	0	1	1	0	26.12	1	55	7.83	3.85	2.89	0.68	285	9.8	10.5	104.5	4.33	5.63	2.07	1.6	3.47	0.95	8.8	2.1	0.425	1.33218	98.6159	0.235294	379.671
0	0	0	0	0	20.19	2	48	6.58	3.66	2.54	0.28	264	11.3	13.8	84.1	4.69	2.85	0.51	1.69	1.71	1.39	4.6	1.9	0.16568	1.44094	103.937	0.110236	380.409
0	0	0	0	0	19.04	1	55	4.86	2.11	2.11	0.47	289	10	10.9	76.2	3.98	3.46	0.48	2.26	1.91	1.82	3.8	2	0.207965	1	136.967	0.222749	289
0	0	0	0	0	17.58	2	50	5.7	2.42	2.71	0.34	390	12.1	15.9	87.1	5.34	5.07	0.64	1.77	2.17	1.23	9	2.8	0.19209	0.892989	143.911	0.125461	348.266
0	0	1	1	0	26.45	1	53	5.41	2.58	2.22	0.38	227	11.1	13.7	133.6	3.88	3.45	0.74	1.73	1.51	1.76	16.9	5.1	0.219653	1.16216	102.252	0.171171	263.811
0	0	0	0	0	18.9	2	50	6.38	4.92	0.99	0.33	282	9.6	10.1	85.9	3.38	4.46	0.54	1.92	2.27	1.7	10.71	2.41	0.171875	4.9697	284.848	0.333333	1401.45
0	0	0	0	0	22.89	1	58	7.07	3.88	2.67	0.31	279	9.6	10.1	83.6	4.35	4.32	1.15	1.17	2.58	1.31	10.1	2.38	0.264957	1.45318	104.494	0.116105	405.438
0	0	0	0	1	19.03	2	71	5.51	2.91	1.44	0.44	260	10.2	11	67.6	2.48	4	0.91	2.04	1.67	2.26	12.02	3.1	0.215686	2.02083	180.556	0.305556	525.417
0	0	1	0	0	26.93	1	60	7.83	4.44	2.4	0.63	340	10.2	11.7	90.6	6.1	4.25	1.11	1.77	2.1	1.57	10.5	2.2	0.355932	1.85	141.667	0.2625	629
0	0	0	0	0	16.75	2	55	6.44	3.85	2.11	0.35	280	10.8	12.5	79.5	6.07	5.71	0.78	1.88	3.03	1.3	8.4	3.7	0.18617	1.82464	132.701	0.165877	510.9
0	0	0	0	0	22.65	1	47	5.43	2.69	2.19	0.44	218	10.3	12.1	87	5.31	3.84	0.59	1.67	1.97	1.85	11.4	4.4	0.263473	1.22831	99.5434	0.200913	267.772
0	0	0	0	1	22.1	2	58	5.88	3.64	1.6	0.53	294	9.5	10	74.9	3.8	4.3	0.39	1.68	2.31	2.08	9.6	3.6	0.315476	2.275	183.75	0.33125	668.85
0	0	1	0	0	14.5	1	45	6.98	4.24	2.08	0.48	219	9.8	16.1	84.8	4.83	4.79	0.94	1.34	2.78	1.41	7.6	2.5	0.358209	2.03846	105.288	0.230769	446.423
0	0	0	0	0	29.1	1	76	8.26	4.73	2.8	0.63	272	10.1	11.2	66.5	3.9	6.02	0.95	1.53	3.79	1.29	11.9	5	0.411765	1.68929	97.1429	0.225	459.486
0	0	0	0	0	22.5	2	75	6.33	3	2.69	0.37	254	10.6	12	67.1	3.96	4.69	1.32	1.29	3.02	1.38	10.5	2.9	0.286822	1.11524	94.4238	0.137546	283.271
0	0	0	1	0	26	1	88	4.73	2.17	1.93	0.31	197	9.9	11.1	76.9	5.53	4.67	4.08	1.12	3.23	1.29	9.9	3.2	0.276786	1.12435	102.073	0.160622	221.497
0	0	0	0	0	23.4	1	77	8.76	4.55	3.27	0.54	284	9.7	11	110.6	6.65	6.86	1.42	1.63	4.56	0.96	4.5	1.6	0.331288	1.39144	86.8502	0.165138	395.168
0	0	0	0	0	23.9	2	52	4.89	2.94	1.39	0.48	246	9.8	10.3	84.6	2.48	2.69	0.46	1.29	1.65	2	19.51	7.07	0.372093	2.11511	176.978	0.345324	520.317
0	0	1	0	0	26	1	59	8.7	5.38	2.75	0.43	260	9.3	9.9	111.9	4.75	5.38	1.67	1.13	3.53	0.95	15.9	4.1	0.380531	1.95636	94.5455	0.156364	508.655
0	0	0	0	0	25.26	2	80	3.68	1.62	1.68	0.23	228	9.7	10.5	72.7	3.78	4.76	1.85	1.36	2.95	1.66	11.8	2.9	0.169118	0.964286	135.714	0.136905	219.857
0	0	0	0	0	20.02	1	66	8.35	5.13	2.61	0.44	378	9.3	9.4	64.4	4.2	3.88	0.88	1.17	2.67	1.56	17.4	5	0.376068	1.96552	144.828	0.168582	742.966
0	0	0	0	0	22.06	2	69	8.41	4.77	2.73	0.54	235	10.4	10.7	68.1	4.51	4.22	0.78	1.75	2.51	1.52	8.6	3.1	0.308571	1.74725	86.0806	0.197802	410.604
0	0	1	1	0	24	1	76	5.44	3.01	1.97	0.31	226	11.1	13.4	90.1	6.33	4.61	1.64	1.56	3.05	1.39	11.8	4.2	0.198718	1.52792	114.721	0.15736	345.31
0	0	0	0	0	23.66	2	58	8	5.88	1.59	0.33	306	11.5	13.8	74.7	4.48	3.46	0.7	1.32	2.26	2.16	12.9	5.2	0.25	3.69811	192.453	0.207547	1131.62
0	0	1	0	0	23.51	1	52	6.16	3.14	2.52	0.36	344	10.1	11.6	92.9	3.79	3.78	0.7	1.32	2.31	1.15	8.9	2	0.272727	1.24603	136.508	0.142857	428.635
0	0	0	0	0	24.44	1	62	6.57	3.49	2.23	0.61	216	10.7	12.5	82.8	3.13	3.76	0.92	1.65	2.32	1.43	7.7	2.3	0.369697	1.56502	96.861	0.273543	338.045
0	0	0	0	0	18.51	2	66	6.17	3.83	1.42	0.34	340	9.6	10.7	85.8	3.25	5.47	2.05	1.38	2.49	1.06	7	2.1	0.246377	2.69718	239.437	0.239437	917.042
0	0	0	0	0	23.72	1	64	6.9	3.62	2.56	0.56	241	10	10.8	103.9	4.14	5.78	0.83	1.86	2.99	1.25	6.6	2.4	0.301075	1.41406	94.1406	0.21875	340.789
0	0	0	0	0	25.8	1	57	6.15	2.5	2.91	0.4	268	8.8	9.2	95.2	3.57	4.08	0.81	1.66	2.11	1.69	9.54	3.81	0.240964	0.859107	92.0962	0.137457	230.241
0	0	0	0	0	22.77	2	74	5.41	2.32	2.32	0.37	351	9.2	10.3	87.2	5.89	5.49	0.94	1.98	2.81	1.74	12.1	3.6	0.186869	1	151.293	0.159483	351
0	0	0	1	0	21.35	1	67	4.67	2.27	1.86	0.34	164	9.7	11.1	103.3	4.6	5.02	2.83	1.82	3.2	0.82	21.3	4.2	0.186813	1.22043	88.172	0.182796	200.151
0	0	0	0	0	16.23	2	59	5.7	3.32	2.01	0.27	229	10	11.1	75.5	6.05	3.88	0.47	1.47	2.11	1.85	12.9	4.5	0.183673	1.65174	113.93	0.134328	378.249
1	1	0	0	0	19.83	1	69	7.38	5.12	1.98	0.67	324	13.2	13.2	93.2	4.09	6.25	0.83	2.4	3.03	1.33	11	2.09	0.279167	2.58586	163.636	0.338384	837.818
1	1	0	0	0	26.03	1	75	9.54	7.23	1.94	0.16	190	7.5	14.5	88.2	5.66	6.61	0.63	1.33	4.6	0.88	11.11	2.79	0.120301	3.7268	97.9381	0.0824742	708.093
1	1	1	0	0	22.06	1	56	9.41	7.11	2.2	0.18	277	9.8	10.3	129.1	10.42	4.23	1.61	1.82	1.88	1.82	6.63	1.82	0.0989011	3.23182	125.909	0.0818182	895.214
1	1	0	0	0	24	1	57	8.38	6.12	1.4	0.59	193	11.8	14.8	89.2	3.18	4.23	1.34	1.25	2.36	1.28	11.44	2.08	0.472	4.37143	137.857	0.421429	843.686
1	1	1	1	0	23.66	1	66	6.84	4.66	1.35	0.18	186	10.1	11.3	97	7.99	4.69	1.54	0.82	1.13	3.47	4.3	1.5	0.219512	3.45185	137.778	0.133333	642.044
1	1	0	0	1	23.51	1	60	12.23	8.78	2.56	0.6	231	6.6	15.4	80.6	6.91	6.65	1.47	1.4	4.87	0.93	6.32	1.9	0.428571	3.42969	90.2344	0.234375	792.258
1	1	1	0	0	24.44	1	51	9.67	5.22	3.21	0.77	377	10.5	11.9	84.4	2.07	6.1	1.79	1.76	3.73	1.11	13.4	3.9	0.4375	1.62617	117.445	0.239875	613.065
1	1	0	0	1	23.41	2	76	6.93	4.73	1.68	0.44	202	11.2	12.1	87.51	8.76	2.77	0.71	1.47	1.43	2.37	7.4	2.5	0.29932	2.81548	120.238	0.261905	568.726
1	1	0	0	0	21.87	1	49	8.34	5.41	2.14	0.55	223	10.1	11	86.1	5.12	5.45	1.64	1.33	3.61	1.41	8.33	1.68	0.413534	2.52804	104.206	0.257009	563.752
1	1	1	0	0	24.09	2	49	7.41	4.36	1.99	0.29	313	6.8	11.2	61.2	5.37	4.67	1.81	0.96	2.94	1.27	11.53	2.77	0.302083	2.19095	157.286	0.145729	685.769
1	1	0	0	0	21.83	1	71	5.45	3.19	1.54	0.46	184	10.5	11.1	116.2	8.17	5.76	2.28	1.81	2.76	1.54	10.7	3.2	0.254144	2.07143	119.481	0.298701	381.143
1	1	0	0	0	27.36	1	77	7.54	4.52	2.36	0.54	254	10.4	12.3	71.1	4.4	5.34	1.65	1.23	3.28	1.31	14.2	2.93	0.439024	1.91525	107.627	0.228814	486.475
1	1	0	0	0	21.8	1	72	5.27	2.72	1.73	0.48	180	10.2	11.1	87.7	3.87	5.06	0.98	2.45	2.5	2.06	23.54	5.48	0.195918	1.57225	104.046	0.277457	283.006
2	1	1	1	0	19.92	1	69	6.48	3.76	2.15	0.52	198	10.5	12.4	123.3	7.62	8.01	1.11	2.01	4.51	0.96	18.9	5.9	0.258706	1.74884	92.093	0.24186	346.27
2	1	0	0	1	23.05	2	63	9.66	7	2.27	0.34	287	9.7	15.6	56.6	3.81	6.05	1.87	1.6	3.96	1.26	12.7	2.7	0.2125	3.0837	126.432	0.14978	885.022
2	1	0	0	0	21.76	1	65	9.44	7.46	1.44	0.38	178	7.3	16.2	112.3	6.23	3.39	0.93	1.53	1.68	2.25	11.63	3.16	0.248366	5.18056	123.611	0.263889	922.139
2	1	1	0	0	21.5	1	82	9.36	7.26	1.72	0.36	286	11	13.7	123	7.25	4.84	0.73	1.86	2.75	1.52	15.91	3.63	0.193548	4.22093	166.279	0.209302	1207.19
2	1	0	0	0	24.91	1	79	5.7	4.12	1.04	0.45	262	9.2	9.6	112.6	5.17	6.45	1.32	1.35	3.87	0.86	12.2	2.6	0.333333	3.96154	251.923	0.432692	1037.92
2	1	0	0	0	29.3	1	59	7.69	5.64	1.59	0.36	183	10.6	16.5	79.7	4.3	4.09	2.27	0.82	3.2	0.64	11.4	3.7	0.439024	3.54717	115.094	0.226415	649.132
2	1	0	0	0	30.64	2	67	8.53	6.15	1.74	0.42	258	8.6	15.3	77	10.02	6.67	1.6	1.33	4.64	0.75	15.09	2.34	0.315789	3.53448	148.276	0.241379	911.897
2	1	0	0	0	23.42	1	77	7.4	5.16	1.54	0.55	181	10.9	12.1	96.7	5.09	5.51	1.88	1.48	3.48	1.26	6.91	2.48	0.371622	3.35065	117.532	0.357143	606.468
2	1	1	0	0	21.67	2	75	6.12	4.27	1.42	0.35	353	9.4	9.9	87.6	4.92	5.26	0.91	1.57	2.97	1.35	7.2	0.8	0.22293	3.00704	248.592	0.246479	1061.49
2	1	0	0	0	25.39	1	60	7.64	5.06	1.83	0.61	216	9.5	15.7	70.2	4.3	4.17	0.67	2.5	1.44	3.45	20.8	7.5	0.244	2.76503	118.033	0.333333	597.246
2	1	1	0	0	21.46	2	73	5.42	3.42	1.56	0.32	258	8.9	8.5	65.4	3.87	6.06	1.31	1.21	4.63	0.94	12.3	4.6	0.264463	2.19231	165.385	0.205128	565.615
2	1	0	0	0	19.56	1	79	5.81	3.21	1.9	0.52	189	11	12.4	139.3	6.03	5.07	0.75	1.37	3.15	0.77	11.6	4	0.379562	1.68947	99.4737	0.273684	319.311
2	1	0	0	1	22.06	2	56	7.06	3.9	2.32	0.29	335	6.9	13.9	53.7	4.33	6.72	1.33	1.52	4.45	0.98	10.52	2.68	0.190789	1.68103	144.397	0.125	563.147
2	1	1	0	0	24.44	2	43	7.35	3.77	2.8	0.6	274	10.9	12	51.4	4.03	3.14	0.82	1.55	1.63	1.47	11.1	4.1	0.387097	1.34643	97.8571	0.214286	368.921
2	1	0	0	0	18.83	1	64	9.67	4.94	3.82	0.71	241	10.3	12.2	72.8	5.47	9.48	2.71	1.32	2.5	1.36	8.9	4	0.537879	1.29319	63.089	0.185864	311.66
2	1	0	0	0	26.12	2	45	5.04	2.89	1.28	0.41	176	7.6	14.5	45.3	3.5	3.24	0.95	1.24	1.63	2.08	5.24	1.47	0.330645	2.25781	137.5	0.320312	397.375
3	1	0	1	0	20.19	1	83	12	9.63	1.48	0.74	385	10.8	12.5	94.9	6.79	5.71	1.48	1.29	3.92	1.29	6.88	1.54	0.573643	6.50676	260.135	0.5	2505.1
3	1	1	1	0	22.43	1	65	8.84	7.2	1.15	0.47	300	10	11.8	73.1	6.2	3.46	0.48	0.88	2.52	1	14.56	2.95	0.534091	6.26087	260.87	0.408696	1878.26
3	1	0	1	0	17.58	1	47	12.55	10.55	1.78	0.2	213	12.1	15.8	102.3	5.3	2.03	2.33	0.72	0.59	2.68	12.33	2.66	0.277778	5.92697	119.663	0.11236	1262.44
3	1	0	1	1	26.45	1	55	5.3	4.04	0.74	0.46	294	9	9	74.4	3.98	4.7	1.48	0.86	3.44	0.75	6.4	2.5	0.534884	5.45946	397.297	0.621622	1605.08
3	1	0	0	0	18.9	2	60	6.63	4.68	1.39	0.49	192	9.7	10	83.9	4.4	5.62	1.32	1.42	3.54	1.2	15.4	3.3	0.34507	3.36691	138.129	0.352518	646.446
3	1	0	0	0	22.89	1	55	7.12	4.57	1.78	0.49	175	10.3	12.1	104.2	5.49	5.76	1.09	1.26	3.47	0.8	7.2	2	0.388889	2.56742	98.3146	0.275281	449.298
3	1	0	0	0	19.03	1	60	6.6	4.13	1.63	0.5	167	10.5	13.3	111.3	5.42	6.81	1.63	1.51	4.44	1.08	18.37	4.44	0.331126	2.53374	102.454	0.306748	423.135
3	1	0	0	0	26.93	1	41	6.04	3.57	1.43	0.41	279	9.8	16	153.5	3.95	6.43	1.29	1.27	3.61	1.05	11.8	3.2	0.322835	2.4965	195.105	0.286713	696.524
3	1	1	0	0	16.75	2	56	7.37	4.57	1.84	0.44	263	10.2	10.9	59.7	2.9	4.41	1.2	1.46	2.35	2.07	6.1	2.1	0.30137	2.4837	142.935	0.23913	653.212
3	1	0	0	0	22.65	1	74	7.12	4.23	2.02	0.64	243	11.3	14.1	103.1	7.86	8.33	1.02	1.95	4.94	1.39	7	0.98	0.328205	2.09406	120.297	0.316832	508.856
3	1	0	0	0	22.1	2	71	4.53	2.68	1.44	0.35	311	8.9	8.9	68.4	4.13	4.56	1.29	1.53	2.2	1.47	14.6	4.4	0.228758	1.86111	215.972	0.243056	578.806
3	1	0	0	0	21.2	1	81	10.35	5.59	3.11	0.9	586	9.5	10.4	75.2	3.67	3.69	0.9	1.09	2.2	1.35	10.74	2.12	0.825688	1.79743	188.424	0.289389	1053.29
3	1	1	1	1	29.1	1	50	5.52	3.19	1.79	0.54	181	10.2	11.7	65.4	4.42	5.54	1.76	1.64	3.16	1.36	7.2	2.4	0.329268	1.78212	101.117	0.301676	322.564
3	1	0	0	0	22.5	1	21	8.95	5.16	2.97	0.74	210	10.2	11.3	71	3.74	5.68	2.52	0.98	4.22	0.95	38.1	10.2	0.755102	1.73737	70.7071	0.249158	364.848
3	1	0	0	0	26	1	40	9.9	5.46	3.23	0.92	252	11.4	13.5	95.42	4.98	6.34	7.91	1.15	4.06	0.74	17	2.5	0.8	1.6904	78.0186	0.28483	425.981
3	1	1	1	0	23.4	1	67	9.57	5.03	3.57	0.66	449	9.8	10.7	105.3	3.95	3.38	1.3	0.86	2.19	1.01	7.4	2.1	0.767442	1.40896	125.77	0.184874	632.625
3	1	0	0	0	23.9	1	67	6.06	2.86	2.08	0.6	269	9.1	16	54.4	3.7	7.95	1.49	1.16	6.06	0.65	8.5	1.6	0.517241	1.375	129.327	0.288462	369.875
3	1	1	1	0	26	1	52	12.15	6.27	5.34	0.48	391	10.5	11.3	78.3	4.43	3.39	0.83	1.12	2.08	1.31	8.46	1.65	0.428571	1.17416	73.221	0.0898876	459.096
3	1	0	0	0	25.26	1	53	10.35	4.9	4.55	0.68	278	11.4	16.5	71.6	7.65	6.57	2.99	1.11	4.7	0.89	11.8	3.5	0.612613	1.07692	61.0989	0.149451	299.385
3	1	0	0	1	20.02	2	34	5.64	2.29	2.93	0.35	259	11.4	16.3	65.3	6.3	5.87	1	1.08	4.13	0.95	30.9	7.7	0.324074	0.78157	88.3959	0.119454	202.427

## Sheet: Normality test
Tests of Normality
Parameters	Group	Shapiro-Wilk
		Statistic	df	Sig.
BMI	control	0.988	49	0.895
	incomplete CRAO	0.959	13	0.735
	subtotal CRAO	0.933	16	0.268
	total CRAO	0.98	20	0.937
age	control	0.926	49	0.004
	incomplete CRAO	0.901	13	0.139
	subtotal CRAO	0.944	16	0.399
	total CRAO	0.982	20	0.957
white blood cell	control	0.946	49	0.026
	incomplete CRAO	0.95	13	0.598
	subtotal CRAO	0.927	16	0.221
	total CRAO	0.93	20	0.155
platelet	control	0.97	49	0.25
	incomplete CRAO	0.867	13	0.048
	subtotal CRAO	0.915	16	0.139
	total CRAO	0.868	20	0.011
mean platelet volume	control	0.967	49	0.177
	incomplete CRAO	0.902	13	0.142
	subtotal CRAO	0.901	16	0.082
	total CRAO	0.961	20	0.562
platelet distribution width	control	0.9	49	0.001
	incomplete CRAO	0.877	13	0.066
	subtotal CRAO	0.942	16	0.372
	total CRAO	0.924	20	0.119
creatinine	control	0.957	49	0.07
	incomplete CRAO	0.907	13	0.164
	subtotal CRAO	0.94	16	0.352
	total CRAO	0.892	20	0.029
urea nitrogen	control	0.969	49	0.214
	incomplete CRAO	0.969	13	0.877
	subtotal CRAO	0.867	16	0.024
	total CRAO	0.919	20	0.094
Total Cholesterol	control	0.982	49	0.643
	incomplete CRAO	0.949	13	0.583
	subtotal CRAO	0.954	16	0.558
	total CRAO	0.971	20	0.786
Triglycerides	control	0.682	49	<0.001
	incomplete CRAO	0.937	13	0.422
	subtotal CRAO	0.894	16	0.065
	total CRAO	0.571	20	<0.001
HDL	control	0.956	49	0.063
	incomplete CRAO	0.928	13	0.325
	subtotal CRAO	0.909	16	0.114
	total CRAO	0.968	20	0.713
LDL	control	0.971	49	0.277
	incomplete CRAO	0.977	13	0.963
	subtotal CRAO	0.912	16	0.125
	total CRAO	0.974	20	0.828
APOA/APOB	control	0.979	49	0.515
	incomplete CRAO	0.829	13	0.015
	subtotal CRAO	0.819	16	0.005
	total CRAO	0.828	20	0.002
T-BIL	control	0.961	49	0.107
	incomplete CRAO	0.876	13	0.062
	subtotal CRAO	0.953	16	0.537
	total CRAO	0.756	20	<0.001
D-BIL	control	0.941	49	0.016
	incomplete CRAO	0.862	13	0.041
	subtotal CRAO	0.943	16	0.381
	total CRAO	0.738	20	<0.001
MHR	control	0.922	49	0.003
	incomplete CRAO	0.925	13	0.289
	subtotal CRAO	0.929	16	0.234
	total CRAO	0.885	20	0.021
NLR	control	0.809	49	<0.001
	incomplete CRAO	0.958	13	0.724
	subtotal CRAO	0.952	16	0.522
	total CRAO	0.796	20	0.001
PLR	control	0.84	49	<0.001
	incomplete CRAO	0.947	13	0.555
	subtotal CRAO	0.876	16	0.033
	total CRAO	0.841	20	0.004
MLR	control	0.943	49	0.02
	incomplete CRAO	0.952	13	0.629
	subtotal CRAO	0.961	16	0.684
	total CRAO	0.918	20	0.092
SII	control	0.827	49	<0.001
	incomplete CRAO	0.963	13	0.804
	subtotal CRAO	0.916	16	0.144
	total CRAO	0.771	20	<0.001
neutrophil	control	0.981	49	0.62
	incomplete CRAO	0.958	13	0.718
	subtotal CRAO	0.925	16	0.205
	total CRAO	0.875	20	0.014
lymphocyte	control	0.988	49	0.887
	incomplete CRAO	0.939	13	0.439
	subtotal CRAO	0.864	16	0.022
	total CRAO	0.883	20	0.02
monocyte	control	0.947	49	0.027
	incomplete CRAO	0.928	13	0.325
	subtotal CRAO	0.928	16	0.229
	total CRAO	0.963	20	0.598
* This is a lower bound of the true significance.
a Lilliefors Significance Correction

## Sheet: Control vs CRAO
Group (0-control,1-incomplete RAO, 2-subtotal RAO, 3-total RAO)	Is it RAO (0-no,1-yes)	Is it hypertensive (0-no,1-yes)	Is it smoking (0-no,1-yes)	Is it diabetes (0-no,1-yes)	BMI	gender (1-male,2-female)	age	white blood cell	neutrophil	lymphocyte	monocyte	platelet	mean platelet volume	platelet distribution width	creatinine	urea nitrogen	Total Cholesterol	Triglycerides	HDL	LDL	APOA/APOB	T-BIL	D-BIL	MHR	NLR	PLR	MLR	SII
0	0	0	0	0	28.01	1	85	4.98	2.87	1.52	0.34	182	10.2	10.4	93	7.51	5.06	1.19	1.56	3.58	1.03	12.9	3.4	0.217949	1.88816	119.737	0.223684	343.645
0	0	0	0	0	23.18	2	61	7.14	3.91	2.56	0.45	170	10.7	16.6	112	7.12	6.27	0.89	1.57	4.1		10.5	2.4	0.286624	1.52734	66.4062	0.175781	259.648
0	0	1	1	0	23.62	1	55	8.4	5.16	2.61	0.44	309	9.7	10.4	99.4	3.93	3.51	1.08	1.12	2.32	1.61	11.9	5.9	0.392857	1.97701	118.391	0.168582	610.897
0	0	0	0	0	29.06	1	54	6	3.75	1.71	0.42	231	10.9	12.8	103	3.43	3.39	0.71	1.8	2	1.67	10.3	3.3	0.233333	2.19298	135.088	0.245614	506.579
0	0	0	0	1	21.22	1	89	8.26	4.1	3.62	0.39	401	10.4	11	93.5	4.63	5.32	1.08	1.75	3.19	1.54	20.49	4.19	0.222857	1.1326	110.773	0.107735	454.171
0	0	0	0	0	20.86	2	46	5.51	2.7	2.34	0.3	260	10.1	11.5	75.9	3.72	4.62	0.83	1.89	2.19	1.88	14.3	4.8	0.15873	1.15385	111.111	0.128205	300
0	0	0	0	0	18	1	56	6.2	4.32	1.33	0.37	295	10	10.8	62.2	5.74	4.19	0.6	1.33	2.61	1.35	14.5	4.4	0.278195	3.24812	221.805	0.278195	958.195
0	0	0	0	1	18.75	2	55	7.58	4.76	2.42	0.28	351	9.2	9.2	73.6	3.71	3.77	1	1.26	2.21	1.69	8.7	2.9	0.222222	1.96694	145.041	0.115702	690.397
0	0	1	1	0	20.81	1	56	8.97	4.81	3.21	0.53	238	9.4	10.2	98.9	5.15	6.22	5.87	1.2	2.62	0.94	13.4	2.3	0.441667	1.49844	74.1433	0.165109	356.629
0	0	1	0	0	26	1	49	8.9	4.46	3.58	0.64	323	9.2	9.9	90.7	6.22	4.39	1.19	1.17	3.4	1.18	9	3.5	0.547009	1.24581	90.2235	0.178771	402.397
0	0	0	0	0	30.3	2	49	5.99	3.31	2.11	0.4	334	9.6	10.4	76.4	5.4	4.13	1.01	1.14	3.09	1.36	8.2	2.5	0.350877	1.56872	158.294	0.189573	523.953
0	0	0	0	1	26.67	1	53	5.44	2.96	1.93	0.25	207	10.6	12.9	67.7	3.63	4.34	2.21	1.19	3.04	1.6	12.6	4.3	0.210084	1.53368	107.254	0.129534	317.472
0	0	1	1	0	25.33	1	78	5.14	2.65	1.86	0.36	189	10.3	11.5	78.9	6.12	4.92	0.69	1.79	2.78	1.83	9.4	2.6	0.201117	1.42473	101.613	0.193548	269.274
0	0	0	0	0	23.24	2	62	8.08	4.32	3.11	0.39	340	10	10.8	84.5	4.3	3.77	0.88	1.59	2.06	1.89	7.8	2	0.245283	1.38907	109.325	0.125402	472.283
0	0	0	0	0	20.08	2	47	5.65	4.19	1.11	0.27	251	9.4	9.6	68.8	3.79	3.77	0.34	1.44	1.9	1.83	11.9	3.2	0.1875	3.77477	226.126	0.243243	947.468
0	0	0	0	0	26.34	1	65	5.45	3.04	1.84	0.37	210	10.3	11.6	97.7	5.82	4.78	2.02	1.77	3.7	1.16	11.7	2.6	0.20904	1.65217	114.13	0.201087	346.957
0	0	1	0	1	22.31	1	49	6.8	3.95	2.03	0.53	234	11	13.2	110.5	4.83	5.13	0.94	1.62	3.29	1.13	13.9	3.3	0.32716	1.94581	115.271	0.261084	455.32
0	0	0	0	0	27.34	2	62	8.01	5.03	1.7	0.42	244	10.6	11.8	84.1	4.53	3.52	1.95	1.67	2.48	0.97	14.6	2.9	0.251497	2.95882	143.529	0.247059	721.953
0	0	1	1	0	26.12	1	55	7.83	3.85	2.89	0.68	285	9.8	10.5	104.5	4.33	5.63	2.07	1.6	3.47	0.95	8.8	2.1	0.425	1.33218	98.6159	0.235294	379.671
0	0	0	0	0	20.19	2	48	6.58	3.66	2.54	0.28	264	11.3	13.8	84.1	4.69	2.85	0.51	1.69	1.71	1.39	4.6	1.9	0.16568	1.44094	103.937	0.110236	380.409
0	0	0	0	0	19.04	1	55	4.86	2.11	2.11	0.47	289	10	10.9	76.2	3.98	3.46	0.48	2.26	1.91	1.82	3.8	2	0.207965	1	136.967	0.222749	289
0	0	0	0	0	17.58	2	50	5.7	2.42	2.71	0.34	390	12.1	15.9	87.1	5.34	5.07	0.64	1.77	2.17	1.23	9	2.8	0.19209	0.892989	143.911	0.125461	348.266
0	0	1	1	0	26.45	1	53	5.41	2.58	2.22	0.38	227	11.1	13.7	133.6	3.88	3.45	0.74	1.73	1.51	1.76	16.9	5.1	0.219653	1.16216	102.252	0.171171	263.811
0	0	0	0	0	18.9	2	50	6.38	4.92	0.99	0.33	282	9.6	10.1	85.9	3.38	4.46	0.54	1.92	2.27	1.7	10.71	2.41	0.171875	4.9697	284.848	0.333333	1401.45
0	0	0	0	0	22.89	1	58	7.07	3.88	2.67	0.31	279	9.6	10.1	83.6	4.35	4.32	1.15	1.17	2.58	1.31	10.1	2.38	0.264957	1.45318	104.494	0.116105	405.438
0	0	0	0	1	19.03	2	71	5.51	2.91	1.44	0.44	260	10.2	11	67.6	2.48	4	0.91	2.04	1.67	2.26	12.02	3.1	0.215686	2.02083	180.556	0.305556	525.417
0	0	1	0	0	26.93	1	60	7.83	4.44	2.4	0.63	340	10.2	11.7	90.6	6.1	4.25	1.11	1.77	2.1	1.57	10.5	2.2	0.355932	1.85	141.667	0.2625	629
0	0	0	0	0	16.75	2	55	6.44	3.85	2.11	0.35	280	10.8	12.5	79.5	6.07	5.71	0.78	1.88	3.03	1.3	8.4	3.7	0.18617	1.82464	132.701	0.165877	510.9
0	0	0	0	0	22.65	1	47	5.43	2.69	2.19	0.44	218	10.3	12.1	87	5.31	3.84	0.59	1.67	1.97	1.85	11.4	4.4	0.263473	1.22831	99.5434	0.200913	267.772
0	0	0	0	1	22.1	2	58	5.88	3.64	1.6	0.53	294	9.5	10	74.9	3.8	4.3	0.39	1.68	2.31	2.08	9.6	3.6	0.315476	2.275	183.75	0.33125	668.85
0	0	1	0	0	14.5	1	45	6.98	4.24	2.08	0.48	219	9.8	16.1	84.8	4.83	4.79	0.94	1.34	2.78	1.41	7.6	2.5	0.358209	2.03846	105.288	0.230769	446.423
0	0	0	0	0	29.1	1	76	8.26	4.73	2.8	0.63	272	10.1	11.2	66.5	3.9	6.02	0.95	1.53	3.79	1.29	11.9	5	0.411765	1.68929	97.1429	0.225	459.486
0	0	0	0	0	22.5	2	75	6.33	3	2.69	0.37	254	10.6	12	67.1	3.96	4.69	1.32	1.29	3.02	1.38	10.5	2.9	0.286822	1.11524	94.4238	0.137546	283.271
0	0	0	1	0	26	1	88	4.73	2.17	1.93	0.31	197	9.9	11.1	76.9	5.53	4.67	4.08	1.12	3.23	1.29	9.9	3.2	0.276786	1.12435	102.073	0.160622	221.497
0	0	0	0	0	23.4	1	77	8.76	4.55	3.27	0.54	284	9.7	11	110.6	6.65	6.86	1.42	1.63	4.56	0.96	4.5	1.6	0.331288	1.39144	86.8502	0.165138	395.168
0	0	0	0	0	23.9	2	52	4.89	2.94	1.39	0.48	246	9.8	10.3	84.6	2.48	2.69	0.46	1.29	1.65	2	19.51	7.07	0.372093	2.11511	176.978	0.345324	520.317
0	0	1	0	0	26	1	59	8.7	5.38	2.75	0.43	260	9.3	9.9	111.9	4.75	5.38	1.67	1.13	3.53	0.95	15.9	4.1	0.380531	1.95636	94.5455	0.156364	508.655
0	0	0	0	0	25.26	2	80	3.68	1.62	1.68	0.23	228	9.7	10.5	72.7	3.78	4.76	1.85	1.36	2.95	1.66	11.8	2.9	0.169118	0.964286	135.714	0.136905	219.857
0	0	0	0	0	20.02	1	66	8.35	5.13	2.61	0.44	378	9.3	9.4	64.4	4.2	3.88	0.88	1.17	2.67	1.56	17.4	5	0.376068	1.96552	144.828	0.168582	742.966
0	0	0	0	0	22.06	2	69	8.41	4.77	2.73	0.54	235	10.4	10.7	68.1	4.51	4.22	0.78	1.75	2.51	1.52	8.6	3.1	0.308571	1.74725	86.0806	0.197802	410.604
0	0	1	1	0	24	1	76	5.44	3.01	1.97	0.31	226	11.1	13.4	90.1	6.33	4.61	1.64	1.56	3.05	1.39	11.8	4.2	0.198718	1.52792	114.721	0.15736	345.31
0	0	0	0	0	23.66	2	58	8	5.88	1.59	0.33	306	11.5	13.8	74.7	4.48	3.46	0.7	1.32	2.26	2.16	12.9	5.2	0.25	3.69811	192.453	0.207547	1131.62
0	0	1	0	0	23.51	1	52	6.16	3.14	2.52	0.36	344	10.1	11.6	92.9	3.79	3.78	0.7	1.32	2.31	1.15	8.9	2	0.272727	1.24603	136.508	0.142857	428.635
0	0	0	0	0	24.44	1	62	6.57	3.49	2.23	0.61	216	10.7	12.5	82.8	3.13	3.76	0.92	1.65	2.32	1.43	7.7	2.3	0.369697	1.56502	96.861	0.273543	338.045
0	0	0	0	0	18.51	2	66	6.17	3.83	1.42	0.34	340	9.6	10.7	85.8	3.25	5.47	2.05	1.38	2.49	1.06	7	2.1	0.246377	2.69718	239.437	0.239437	917.042
0	0	0	0	0	23.72	1	64	6.9	3.62	2.56	0.56	241	10	10.8	103.9	4.14	5.78	0.83	1.86	2.99	1.25	6.6	2.4	0.301075	1.41406	94.1406	0.21875	340.789
0	0	0	0	0	25.8	1	57	6.15	2.5	2.91	0.4	268	8.8	9.2	95.2	3.57	4.08	0.81	1.66	2.11	1.69	9.54	3.81	0.240964	0.859107	92.0962	0.137457	230.241
0	0	0	0	0	22.77	2	74	5.41	2.32	2.32	0.37	351	9.2	10.3	87.2	5.89	5.49	0.94	1.98	2.81	1.74	12.1	3.6	0.186869	1	151.293	0.159483	351
0	0	0	1	0	21.35	1	67	4.67	2.27	1.86	0.34	164	9.7	11.1	103.3	4.6	5.02	2.83	1.82	3.2	0.82	21.3	4.2	0.186813	1.22043	88.172	0.182796	200.151
0	0	0	0	0	16.23	2	59	5.7	3.32	2.01	0.27	229	10	11.1	75.5	6.05	3.88	0.47	1.47	2.11	1.85	12.9	4.5	0.183673	1.65174	113.93	0.134328	378.249
1	1	0	0	0	19.83	1	69	7.38	5.12	1.98	0.67	324	13.2	13.2	93.2	4.09	6.25	0.83	2.4	3.03	1.33	11	2.09	0.279167	2.58586	163.636	0.338384	837.818
1	1	0	0	0	26.03	1	75	9.54	7.23	1.94	0.16	190	7.5	14.5	88.2	5.66	6.61	0.63	1.33	4.6	0.88	11.11	2.79	0.120301	3.7268	97.9381	0.0824742	708.093
1	1	1	0	0	22.06	1	56	9.41	7.11	2.2	0.18	277	9.8	10.3	129.1	10.42	4.23	1.61	1.82	1.88	1.82	6.63	1.82	0.0989011	3.23182	125.909	0.0818182	895.214
1	1	0	0	0	24	1	57	8.38	6.12	1.4	0.59	193	11.8	14.8	89.2	3.18	4.23	1.34	1.25	2.36	1.28	11.44	2.08	0.472	4.37143	137.857	0.421429	843.686
1	1	1	1	0	23.66	1	66	6.84	4.66	1.35	0.18	186	10.1	11.3	97	7.99	4.69	1.54	0.82	1.13	3.47	4.3	1.5	0.219512	3.45185	137.778	0.133333	642.044
1	1	0	0	1	23.51	1	60	12.23	8.78	2.56	0.6	231	6.6	15.4	80.6	6.91	6.65	1.47	1.4	4.87	0.93	6.32	1.9	0.428571	3.42969	90.2344	0.234375	792.258
1	1	1	0	0	24.44	1	51	9.67	5.22	3.21	0.77	377	10.5	11.9	84.4	2.07	6.1	1.79	1.76	3.73	1.11	13.4	3.9	0.4375	1.62617	117.445	0.239875	613.065
1	1	0	0	1	23.41	2	76	6.93	4.73	1.68	0.44	202	11.2	12.1	87.51	8.76	2.77	0.71	1.47	1.43	2.37	7.4	2.5	0.29932	2.81548	120.238	0.261905	568.726
1	1	0	0	0	21.87	1	49	8.34	5.41	2.14	0.55	223	10.1	11	86.1	5.12	5.45	1.64	1.33	3.61	1.41	8.33	1.68	0.413534	2.52804	104.206	0.257009	563.752
1	1	1	0	0	24.09	2	49	7.41	4.36	1.99	0.29	313	6.8	11.2	61.2	5.37	4.67	1.81	0.96	2.94	1.27	11.53	2.77	0.302083	2.19095	157.286	0.145729	685.769
1	1	0	0	0	21.83	1	71	5.45	3.19	1.54	0.46	184	10.5	11.1	116.2	8.17	5.76	2.28	1.81	2.76	1.54	10.7	3.2	0.254144	2.07143	119.481	0.298701	381.143
1	1	0	0	0	27.36	1	77	7.54	4.52	2.36	0.54	254	10.4	12.3	71.1	4.4	5.34	1.65	1.23	3.28	1.31	14.2	2.93	0.439024	1.91525	107.627	0.228814	486.475
1	1	0	0	0	21.8	1	72	5.27	2.72	1.73	0.48	180	10.2	11.1	87.7	3.87	5.06	0.98	2.45	2.5	2.06	23.54	5.48	0.195918	1.57225	104.046	0.277457	283.006
1	1	1	1	0	19.92	1	69	6.48	3.76	2.15	0.52	198	10.5	12.4	123.3	7.62	8.01	1.11	2.01	4.51	0.96	18.9	5.9	0.258706	1.74884	92.093	0.24186	346.27
1	1	0	0	1	23.05	2	63	9.66	7	2.27	0.34	287	9.7	15.6	56.6	3.81	6.05	1.87	1.6	3.96	1.26	12.7	2.7	0.2125	3.0837	126.432	0.14978	885.022
1	1	0	0	0	21.76	1	65	9.44	7.46	1.44	0.38	178	7.3	16.2	112.3	6.23	3.39	0.93	1.53	1.68	2.25	11.63	3.16	0.248366	5.18056	123.611	0.263889	922.139
1	1	1	0	0	21.5	1	82	9.36	7.26	1.72	0.36	286	11	13.7	123	7.25	4.84	0.73	1.86	2.75	1.52	15.91	3.63	0.193548	4.22093	166.279	0.209302	1207.19
1	1	0	0	0	24.91	1	79	5.7	4.12	1.04	0.45	262	9.2	9.6	112.6	5.17	6.45	1.32	1.35	3.87	0.86	12.2	2.6	0.333333	3.96154	251.923	0.432692	1037.92
1	1	0	0	0	29.3	1	59	7.69	5.64	1.59	0.36	183	10.6	16.5	79.7	4.3	4.09	2.27	0.82	3.2	0.64	11.4	3.7	0.439024	3.54717	115.094	0.226415	649.132
1	1	0	0	0	30.64	2	67	8.53	6.15	1.74	0.42	258	8.6	15.3	77	10.02	6.67	1.6	1.33	4.64	0.75	15.09	2.34	0.315789	3.53448	148.276	0.241379	911.897
1	1	0	0	0	23.42	1	77	7.4	5.16	1.54	0.55	181	10.9	12.1	96.7	5.09	5.51	1.88	1.48	3.48	1.26	6.91	2.48	0.371622	3.35065	117.532	0.357143	606.468
1	1	1	0	0	21.67	2	75	6.12	4.27	1.42	0.35	353	9.4	9.9	87.6	4.92	5.26	0.91	1.57	2.97	1.35	7.2	0.8	0.22293	3.00704	248.592	0.246479	1061.49
1	1	0	0	0	25.39	1	60	7.64	5.06	1.83	0.61	216	9.5	15.7	70.2	4.3	4.17	0.67	2.5	1.44	3.45	20.8	7.5	0.244	2.76503	118.033	0.333333	597.246
1	1	1	0	0	21.46	2	73	5.42	3.42	1.56	0.32	258	8.9	8.5	65.4	3.87	6.06	1.31	1.21	4.63	0.94	12.3	4.6	0.264463	2.19231	165.385	0.205128	565.615
1	1	0	0	0	19.56	1	79	5.81	3.21	1.9	0.52	189	11	12.4	139.3	6.03	5.07	0.75	1.37	3.15	0.77	11.6	4	0.379562	1.68947	99.4737	0.273684	319.311
1	1	0	0	1	22.06	2	56	7.06	3.9	2.32	0.29	335	6.9	13.9	53.7	4.33	6.72	1.33	1.52	4.45	0.98	10.52	2.68	0.190789	1.68103	144.397	0.125	563.147
1	1	1	0	0	24.44	2	43	7.35	3.77	2.8	0.6	274	10.9	12	51.4	4.03	3.14	0.82	1.55	1.63	1.47	11.1	4.1	0.387097	1.34643	97.8571	0.214286	368.921
1	1	0	0	0	18.83	1	64	9.67	4.94	3.82	0.71	241	10.3	12.2	72.8	5.47	9.48	2.71	1.32	2.5	1.36	8.9	4	0.537879	1.29319	63.089	0.185864	311.66
1	1	0	0	0	26.12	2	45	5.04	2.89	1.28	0.41	176	7.6	14.5	45.3	3.5	3.24	0.95	1.24	1.63	2.08	5.24	1.47	0.330645	2.25781	137.5	0.320312	397.375
1	1	0	1	0	20.19	1	83	12	9.63	1.48	0.74	385	10.8	12.5	94.9	6.79	5.71	1.48	1.29	3.92	1.29	6.88	1.54	0.573643	6.50676	260.135	0.5	2505.1
1	1	1	1	0	22.43	1	65	8.84	7.2	1.15	0.47	300	10	11.8	73.1	6.2	3.46	0.48	0.88	2.52	1	14.56	2.95	0.534091	6.26087	260.87	0.408696	1878.26
1	1	0	1	0	17.58	1	47	12.55	10.55	1.78	0.2	213	12.1	15.8	102.3	5.3	2.03	2.33	0.72	0.59	2.68	12.33	2.66	0.277778	5.92697	119.663	0.11236	1262.44
1	1	0	1	1	26.45	1	55	5.3	4.04	0.74	0.46	294	9	9	74.4	3.98	4.7	1.48	0.86	3.44	0.75	6.4	2.5	0.534884	5.45946	397.297	0.621622	1605.08
1	1	0	0	0	18.9	2	60	6.63	4.68	1.39	0.49	192	9.7	10	83.9	4.4	5.62	1.32	1.42	3.54	1.2	15.4	3.3	0.34507	3.36691	138.129	0.352518	646.446
1	1	0	0	0	22.89	1	55	7.12	4.57	1.78	0.49	175	10.3	12.1	104.2	5.49	5.76	1.09	1.26	3.47	0.8	7.2	2	0.388889	2.56742	98.3146	0.275281	449.298
1	1	0	0	0	19.03	1	60	6.6	4.13	1.63	0.5	167	10.5	13.3	111.3	5.42	6.81	1.63	1.51	4.44	1.08	18.37	4.44	0.331126	2.53374	102.454	0.306748	423.135
1	1	0	0	0	26.93	1	41	6.04	3.57	1.43	0.41	279	9.8	16	153.5	3.95	6.43	1.29	1.27	3.61	1.05	11.8	3.2	0.322835	2.4965	195.105	0.286713	696.524
1	1	1	0	0	16.75	2	56	7.37	4.57	1.84	0.44	263	10.2	10.9	59.7	2.9	4.41	1.2	1.46	2.35	2.07	6.1	2.1	0.30137	2.4837	142.935	0.23913	653.212
1	1	0	0	0	22.65	1	74	7.12	4.23	2.02	0.64	243	11.3	14.1	103.1	7.86	8.33	1.02	1.95	4.94	1.39	7	0.98	0.328205	2.09406	120.297	0.316832	508.856
1	1	0	0	0	22.1	2	71	4.53	2.68	1.44	0.35	311	8.9	8.9	68.4	4.13	4.56	1.29	1.53	2.2	1.47	14.6	4.4	0.228758	1.86111	215.972	0.243056	578.806
1	1	0	0	0	21.2	1	81	10.35	5.59	3.11	0.9	586	9.5	10.4	75.2	3.67	3.69	0.9	1.09	2.2	1.35	10.74	2.12	0.825688	1.79743	188.424	0.289389	1053.29
1	1	1	1	1	29.1	1	50	5.52	3.19	1.79	0.54	181	10.2	11.7	65.4	4.42	5.54	1.76	1.64	3.16	1.36	7.2	2.4	0.329268	1.78212	101.117	0.301676	322.564
1	1	0	0	0	22.5	1	21	8.95	5.16	2.97	0.74	210	10.2	11.3	71	3.74	5.68	2.52	0.98	4.22	0.95	38.1	10.2	0.755102	1.73737	70.7071	0.249158	364.848
1	1	0	0	0	26	1	40	9.9	5.46	3.23	0.92	252	11.4	13.5	95.42	4.98	6.34	7.91	1.15	4.06	0.74	17	2.5	0.8	1.6904	78.0186	0.28483	425.981
1	1	1	1	0	23.4	1	67	9.57	5.03	3.57	0.66	449	9.8	10.7	105.3	3.95	3.38	1.3	0.86	2.19	1.01	7.4	2.1	0.767442	1.40896	125.77	0.184874	632.625
1	1	0	0	0	23.9	1	67	6.06	2.86	2.08	0.6	269	9.1	16	54.4	3.7	7.95	1.49	1.16	6.06	0.65	8.5	1.6	0.517241	1.375	129.327	0.288462	369.875
1	1	1	1	0	26	1	52	12.15	6.27	5.34	0.48	391	10.5	11.3	78.3	4.43	3.39	0.83	1.12	2.08	1.31	8.46	1.65	0.428571	1.17416	73.221	0.0898876	459.096
1	1	0	0	0	25.26	1	53	10.35	4.9	4.55	0.68	278	11.4	16.5	71.6	7.65	6.57	2.99	1.11	4.7	0.89	11.8	3.5	0.612613	1.07692	61.0989	0.149451	299.385
1	1	0	0	1	20.02	2	34	5.64	2.29	2.93	0.35	259	11.4	16.3	65.3	6.3	5.87	1	1.08	4.13	0.95	30.9	7.7	0.324074	0.78157	88.3959	0.119454	202.427

## Sheet: Different CRAO
Group (0-control,1-incomplete RAO, 2-subtotal RAO, 3-total RAO)	Is it RAO (0-no,1-yes)	Is it hypertensive (0-no,1-yes)	Is it smoking (0-no,1-yes)	Is it diabetes (0-no,1-yes)	BMI	gender (1-male,2-female)	age	white blood cell	neutrophil	lymphocyte	monocyte	platelet	mean platelet volume	platelet distribution width	creatinine	urea nitrogen	Total Cholesterol	Triglycerides	HDL	LDL	APOA/APOB	T-BIL	D-BIL	MHR	NLR	PLR	MLR	SII
1	1	0	0	0	19.83	1	69	7.38	5.12	1.98	0.67	324	13.2	13.2	93.2	4.09	6.25	0.83	2.4	3.03	1.33	11	2.09	0.279167	2.58586	163.636	0.338384	837.818
1	1	0	0	0	26.03	1	75	9.54	7.23	1.94	0.16	190	7.5	14.5	88.2	5.66	6.61	0.63	1.33	4.6	0.88	11.11	2.79	0.120301	3.7268	97.9381	0.0824742	708.093
1	1	1	0	0	22.06	1	56	9.41	7.11	2.2	0.18	277	9.8	10.3	129.1	10.42	4.23	1.61	1.82	1.88	1.82	6.63	1.82	0.0989011	3.23182	125.909	0.0818182	895.214
1	1	0	0	0	24	1	57	8.38	6.12	1.4	0.59	193	11.8	14.8	89.2	3.18	4.23	1.34	1.25	2.36	1.28	11.44	2.08	0.472	4.37143	137.857	0.421429	843.686
1	1	1	1	0	23.66	1	66	6.84	4.66	1.35	0.18	186	10.1	11.3	97	7.99	4.69	1.54	0.82	1.13	3.47	4.3	1.5	0.219512	3.45185	137.778	0.133333	642.044
1	1	0	0	1	23.51	1	60	12.23	8.78	2.56	0.6	231	6.6	15.4	80.6	6.91	6.65	1.47	1.4	4.87	0.93	6.32	1.9	0.428571	3.42969	90.2344	0.234375	792.258
1	1	1	0	0	24.44	1	51	9.67	5.22	3.21	0.77	377	10.5	11.9	84.4	2.07	6.1	1.79	1.76	3.73	1.11	13.4	3.9	0.4375	1.62617	117.445	0.239875	613.065
1	1	0	0	1	23.41	2	76	6.93	4.73	1.68	0.44	202	11.2	12.1	87.51	8.76	2.77	0.71	1.47	1.43	2.37	7.4	2.5	0.29932	2.81548	120.238	0.261905	568.726
1	1	0	0	0	21.87	1	49	8.34	5.41	2.14	0.55	223	10.1	11	86.1	5.12	5.45	1.64	1.33	3.61	1.41	8.33	1.68	0.413534	2.52804	104.206	0.257009	563.752
1	1	1	0	0	24.09	2	49	7.41	4.36	1.99	0.29	313	6.8	11.2	61.2	5.37	4.67	1.81	0.96	2.94	1.27	11.53	2.77	0.302083	2.19095	157.286	0.145729	685.769
1	1	0	0	0	21.83	1	71	5.45	3.19	1.54	0.46	184	10.5	11.1	116.2	8.17	5.76	2.28	1.81	2.76	1.54	10.7	3.2	0.254144	2.07143	119.481	0.298701	381.143
1	1	0	0	0	27.36	1	77	7.54	4.52	2.36	0.54	254	10.4	12.3	71.1	4.4	5.34	1.65	1.23	3.28	1.31	14.2	2.93	0.439024	1.91525	107.627	0.228814	486.475
1	1	0	0	0	21.8	1	72	5.27	2.72	1.73	0.48	180	10.2	11.1	87.7	3.87	5.06	0.98	2.45	2.5	2.06	23.54	5.48	0.195918	1.57225	104.046	0.277457	283.006
2	1	1	1	0	19.92	1	69	6.48	3.76	2.15	0.52	198	10.5	12.4	123.3	7.62	8.01	1.11	2.01	4.51	0.96	18.9	5.9	0.258706	1.74884	92.093	0.24186	346.27
2	1	0	0	1	23.05	2	63	9.66	7	2.27	0.34	287	9.7	15.6	56.6	3.81	6.05	1.87	1.6	3.96	1.26	12.7	2.7	0.2125	3.0837	126.432	0.14978	885.022
2	1	0	0	0	21.76	1	65	9.44	7.46	1.44	0.38	178	7.3	16.2	112.3	6.23	3.39	0.93	1.53	1.68	2.25	11.63	3.16	0.248366	5.18056	123.611	0.263889	922.139
2	1	1	0	0	21.5	1	82	9.36	7.26	1.72	0.36	286	11	13.7	123	7.25	4.84	0.73	1.86	2.75	1.52	15.91	3.63	0.193548	4.22093	166.279	0.209302	1207.19
2	1	0	0	0	24.91	1	79	5.7	4.12	1.04	0.45	262	9.2	9.6	112.6	5.17	6.45	1.32	1.35	3.87	0.86	12.2	2.6	0.333333	3.96154	251.923	0.432692	1037.92
2	1	0	0	0	29.3	1	59	7.69	5.64	1.59	0.36	183	10.6	16.5	79.7	4.3	4.09	2.27	0.82	3.2	0.64	11.4	3.7	0.439024	3.54717	115.094	0.226415	649.132
2	1	0	0	0	30.64	2	67	8.53	6.15	1.74	0.42	258	8.6	15.3	77	10.02	6.67	1.6	1.33	4.64	0.75	15.09	2.34	0.315789	3.53448	148.276	0.241379	911.897
2	1	0	0	0	23.42	1	77	7.4	5.16	1.54	0.55	181	10.9	12.1	96.7	5.09	5.51	1.88	1.48	3.48	1.26	6.91	2.48	0.371622	3.35065	117.532	0.357143	606.468
2	1	1	0	0	21.67	2	75	6.12	4.27	1.42	0.35	353	9.4	9.9	87.6	4.92	5.26	0.91	1.57	2.97	1.35	7.2	0.8	0.22293	3.00704	248.592	0.246479	1061.49
2	1	0	0	0	25.39	1	60	7.64	5.06	1.83	0.61	216	9.5	15.7	70.2	4.3	4.17	0.67	2.5	1.44	3.45	20.8	7.5	0.244	2.76503	118.033	0.333333	597.246
2	1	1	0	0	21.46	2	73	5.42	3.42	1.56	0.32	258	8.9	8.5	65.4	3.87	6.06	1.31	1.21	4.63	0.94	12.3	4.6	0.264463	2.19231	165.385	0.205128	565.615
2	1	0	0	0	19.56	1	79	5.81	3.21	1.9	0.52	189	11	12.4	139.3	6.03	5.07	0.75	1.37	3.15	0.77	11.6	4	0.379562	1.68947	99.4737	0.273684	319.311
2	1	0	0	1	22.06	2	56	7.06	3.9	2.32	0.29	335	6.9	13.9	53.7	4.33	6.72	1.33	1.52	4.45	0.98	10.52	2.68	0.190789	1.68103	144.397	0.125	563.147
2	1	1	0	0	24.44	2	43	7.35	3.77	2.8	0.6	274	10.9	12	51.4	4.03	3.14	0.82	1.55	1.63	1.47	11.1	4.1	0.387097	1.34643	97.8571	0.214286	368.921
2	1	0	0	0	18.83	1	64	9.67	4.94	3.82	0.71	241	10.3	12.2	72.8	5.47	9.48	2.71	1.32	2.5	1.36	8.9	4	0.537879	1.29319	63.089	0.185864	311.66
2	1	0	0	0	26.12	2	45	5.04	2.89	1.28	0.41	176	7.6	14.5	45.3	3.5	3.24	0.95	1.24	1.63	2.08	5.24	1.47	0.330645	2.25781	137.5	0.320312	397.375
3	1	0	1	0	20.19	1	83	12	9.63	1.48	0.74	385	10.8	12.5	94.9	6.79	5.71	1.48	1.29	3.92	1.29	6.88	1.54	0.573643	6.50676	260.135	0.5	2505.1
3	1	1	1	0	22.43	1	65	8.84	7.2	1.15	0.47	300	10	11.8	73.1	6.2	3.46	0.48	0.88	2.52	1	14.56	2.95	0.534091	6.26087	260.87	0.408696	1878.26
3	1	0	1	0	17.58	1	47	12.55	10.55	1.78	0.2	213	12.1	15.8	102.3	5.3	2.03	2.33	0.72	0.59	2.68	12.33	2.66	0.277778	5.92697	119.663	0.11236	1262.44
3	1	0	1	1	26.45	1	55	5.3	4.04	0.74	0.46	294	9	9	74.4	3.98	4.7	1.48	0.86	3.44	0.75	6.4	2.5	0.534884	5.45946	397.297	0.621622	1605.08
3	1	0	0	0	18.9	2	60	6.63	4.68	1.39	0.49	192	9.7	10	83.9	4.4	5.62	1.32	1.42	3.54	1.2	15.4	3.3	0.34507	3.36691	138.129	0.352518	646.446
3	1	0	0	0	22.89	1	55	7.12	4.57	1.78	0.49	175	10.3	12.1	104.2	5.49	5.76	1.09	1.26	3.47	0.8	7.2	2	0.388889	2.56742	98.3146	0.275281	449.298
3	1	0	0	0	19.03	1	60	6.6	4.13	1.63	0.5	167	10.5	13.3	111.3	5.42	6.81	1.63	1.51	4.44	1.08	18.37	4.44	0.331126	2.53374	102.454	0.306748	423.135
3	1	0	0	0	26.93	1	41	6.04	3.57	1.43	0.41	279	9.8	16	153.5	3.95	6.43	1.29	1.27	3.61	1.05	11.8	3.2	0.322835	2.4965	195.105	0.286713	696.524
3	1	1	0	0	16.75	2	56	7.37	4.57	1.84	0.44	263	10.2	10.9	59.7	2.9	4.41	1.2	1.46	2.35	2.07	6.1	2.1	0.30137	2.4837	142.935	0.23913	653.212
3	1	0	0	0	22.65	1	74	7.12	4.23	2.02	0.64	243	11.3	14.1	103.1	7.86	8.33	1.02	1.95	4.94	1.39	7	0.98	0.328205	2.09406	120.297	0.316832	508.856
3	1	0	0	0	22.1	2	71	4.53	2.68	1.44	0.35	311	8.9	8.9	68.4	4.13	4.56	1.29	1.53	2.2	1.47	14.6	4.4	0.228758	1.86111	215.972	0.243056	578.806
3	1	0	0	0	21.2	1	81	10.35	5.59	3.11	0.9	586	9.5	10.4	75.2	3.67	3.69	0.9	1.09	2.2	1.35	10.74	2.12	0.825688	1.79743	188.424	0.289389	1053.29
3	1	1	1	1	29.1	1	50	5.52	3.19	1.79	0.54	181	10.2	11.7	65.4	4.42	5.54	1.76	1.64	3.16	1.36	7.2	2.4	0.329268	1.78212	101.117	0.301676	322.564
3	1	0	0	0	22.5	1	21	8.95	5.16	2.97	0.74	210	10.2	11.3	71	3.74	5.68	2.52	0.98	4.22	0.95	38.1	10.2	0.755102	1.73737	70.7071	0.249158	364.848
3	1	0	0	0	26	1	40	9.9	5.46	3.23	0.92	252	11.4	13.5	95.42	4.98	6.34	7.91	1.15	4.06	0.74	17	2.5	0.8	1.6904	78.0186	0.28483	425.981
3	1	1	1	0	23.4	1	67	9.57	5.03	3.57	0.66	449	9.8	10.7	105.3	3.95	3.38	1.3	0.86	2.19	1.01	7.4	2.1	0.767442	1.40896	125.77	0.184874	632.625
3	1	0	0	0	23.9	1	67	6.06	2.86	2.08	0.6	269	9.1	16	54.4	3.7	7.95	1.49	1.16	6.06	0.65	8.5	1.6	0.517241	1.375	129.327	0.288462	369.875
3	1	1	1	0	26	1	52	12.15	6.27	5.34	0.48	391	10.5	11.3	78.3	4.43	3.39	0.83	1.12	2.08	1.31	8.46	1.65	0.428571	1.17416	73.221	0.0898876	459.096
3	1	0	0	0	25.26	1	53	10.35	4.9	4.55	0.68	278	11.4	16.5	71.6	7.65	6.57	2.99	1.11	4.7	0.89	11.8	3.5	0.612613	1.07692	61.0989	0.149451	299.385
3	1	0	0	1	20.02	2	34	5.64	2.29	2.93	0.35	259	11.4	16.3	65.3	6.3	5.87	1	1.08	4.13	0.95	30.9	7.7	0.324074	0.78157	88.3959	0.119454	202.427

## Sheet: Correlation analysis
Characteristic	Onset of RAO				Severity of RAO
	rs		P		r		P
Age	0.074		0.467		0.01		0.921
Gender	-0.163		0.107		-0.154		0.127
White blood cell	0.325		0.001		0.3		0.003
Neutrophil	0.433		<0.001		0.376		<0.001
Lymphocyte	-0.192		0.057		-0.16		0.114
Monocyte	0.27		0.007		0.31		0.002
Platelet	-0.137		0.176		-0.075		0.462
Total Cholesterol	0.307		0.002		0.284		0.004
Triglycerides	0.297		0.003		0.291		0.003
HDL-C	-0.266		0.008		-0.343		0.001
LDL-C	0.253		0.011		0.278		0.005
MHR	0.356		<0.001		0.429		<0.001
NLR	0.433		<0.001		0.355		<0.001
PLR	0.082		0.42		0.08		0.433
SII	0.345		<0.001		0.3		0.003

## Sheet: RCS
	Normal control	CRAO	p	test					incomplete RAO	subtotal RAO	total RAO	p	test
n	50	49						n	13	16	20
age (median [IQR])	58.00 [53.00, 66.75]	63.00 [53.00, 72.00]	0.464	nonnorm				age (median [IQR])	66.00 [56.00, 72.00]	66.00 [59.75, 75.50]	55.50 [49.25, 67.00]	0.122	nonnorm
gender = 2 (%)	21 (42.0)	13 (26.5)	0.159					gender = 2 (%)	2 (15.4)	7 (43.8)	4 (20.0)	0.157
LDL (median [IQR])	2.59 [2.17, 3.08]	3.20 [2.35, 4.06]	0.012	nonnorm				LDL (median [IQR])	2.94 [2.36, 3.61]	3.17 [2.30, 4.08]	3.50 [2.31, 4.15]	0.564	nonnorm
Total.Cholesterol (median [IQR])	4.36 [3.80, 5.07]	5.51 [4.23, 6.34]	0.002	nonnorm				Total.Cholesterol (median [IQR])	5.34 [4.67, 6.10]	5.38 [4.15, 6.51]	5.65 [4.23, 6.36]	0.949	nonnorm
white.blood.cell (median [IQR])	6.27 [5.46, 7.83]	7.40 [6.12, 9.44]	0.001	nonnorm				white.blood.cell (median [IQR])	7.54 [6.93, 9.41]	7.38 [6.04, 8.74]	7.24 [6.06, 10.01]	0.708	nonnorm
neutrophil (median [IQR])	3.70 [2.92, 4.41]	4.73 [3.90, 5.64]	<0.001	nonnorm				neutrophil (median [IQR])	5.12 [4.52, 6.12]	4.61 [3.77, 5.77]	4.62 [3.92, 5.49]	0.667	nonnorm
lymphocyte (median [IQR])	2.20 [1.85, 2.65]	1.83 [1.54, 2.32]	0.057	nonnorm				lymphocyte (median [IQR])	1.98 [1.68, 2.20]	1.73 [1.52, 2.18]	1.81 [1.47, 3.00]	0.629	nonnorm
monocyte (median [IQR])	0.39 [0.34, 0.48]	0.48 [0.36, 0.60]	0.008	nonnorm				monocyte (median [IQR])	0.48 [0.29, 0.59]	0.42 [0.36, 0.53]	0.50 [0.46, 0.66]	0.18	nonnorm
platelet (median [IQR])	260.00 [228.25, 303.25]	254.00 [192.00, 287.00]	0.175	nonnorm				platelet (median [IQR])	223.00 [190.00, 277.00]	249.50 [187.50, 277.00]	266.00 [212.25, 302.75]	0.368	nonnorm
HDL (median [IQR])	1.60 [1.32, 1.77]	1.33 [1.15, 1.55]	0.008	nonnorm				HDL (median [IQR])	1.40 [1.25, 1.81]	1.50 [1.33, 1.58]	1.15 [1.06, 1.43]	0.022	nonnorm
NLR (median [IQR])	1.55 [1.25, 1.97]	2.50 [1.74, 3.43]	<0.001	nonnorm				NLR (median [IQR])	2.59 [2.07, 3.43]	2.89 [1.73, 3.54]	1.98 [1.62, 2.77]	0.496	nonnorm
PLR (median [IQR])	114.03 [98.85, 143.82]	120.30 [101.12, 148.28]	0.417	nonnorm				PLR (median [IQR])	119.48 [104.21, 137.78]	125.02 [111.19, 152.55]	123.03 [95.83, 190.09]	0.829	nonnorm
MLR (median [IQR])	0.18 [0.15, 0.23]	0.25 [0.21, 0.30]	0.001	nonnorm				MLR (median [IQR])	0.24 [0.15, 0.28]	0.24 [0.21, 0.29]	0.29 [0.23, 0.31]	0.413	nonnorm
MHR (median [IQR])	0.25 [0.21, 0.33]	0.33 [0.26, 0.44]	<0.001	nonnorm				MHR (median [IQR])	0.30 [0.22, 0.43]	0.29 [0.24, 0.37]	0.41 [0.33, 0.58]	0.007	nonnorm
SII (median [IQR])	403.92 [338.73, 523.04]	606.47 [423.13, 843.69]	0.001	nonnorm				SII (median [IQR])	642.04 [563.75, 792.26]	601.86 [390.26, 914.46]	543.83 [409.82, 785.72]	0.913	nonnorm
